# Supplementary material
Source: PubMed Central journal article supplement (PMC6397095)

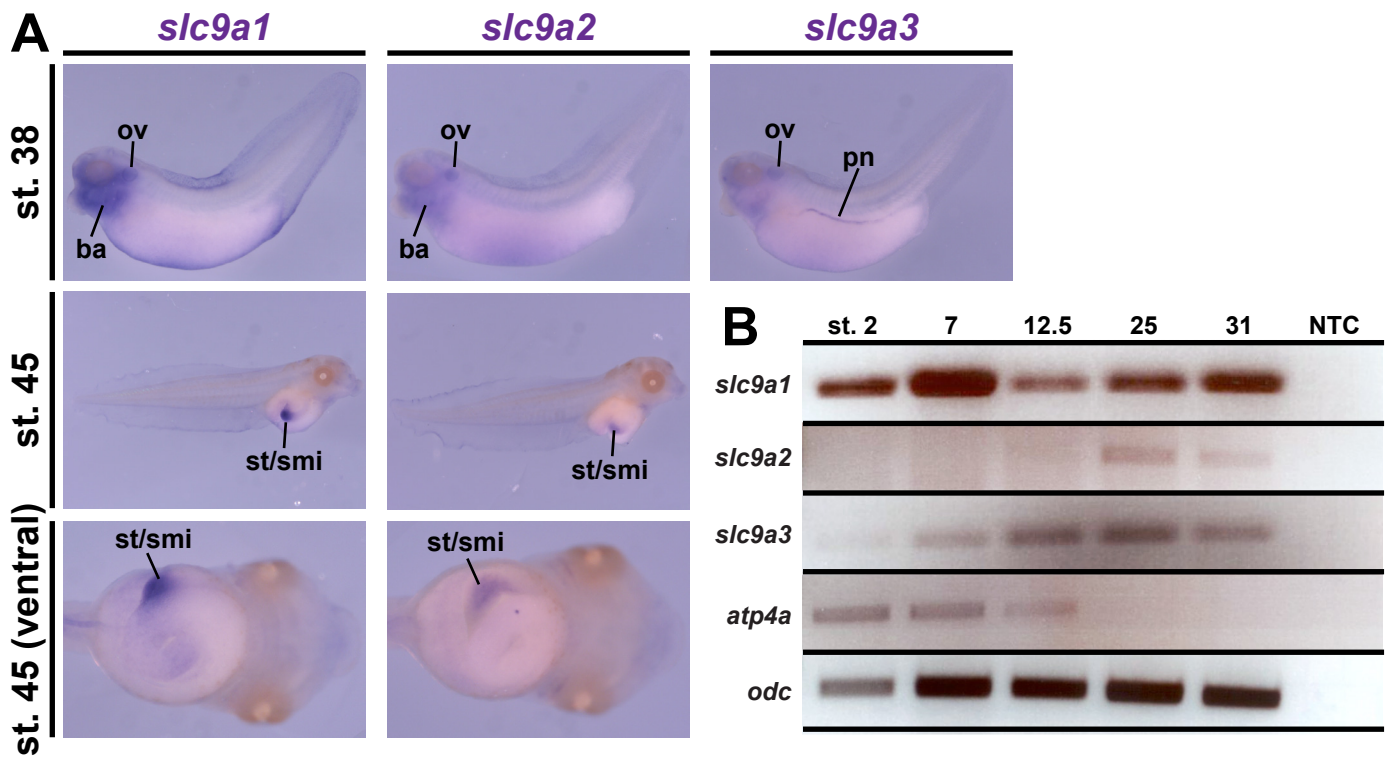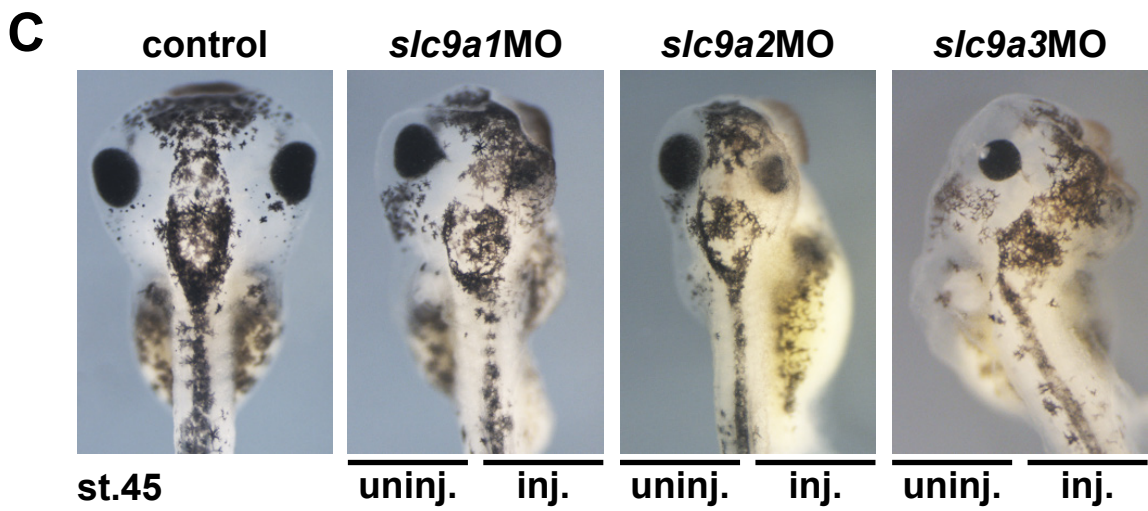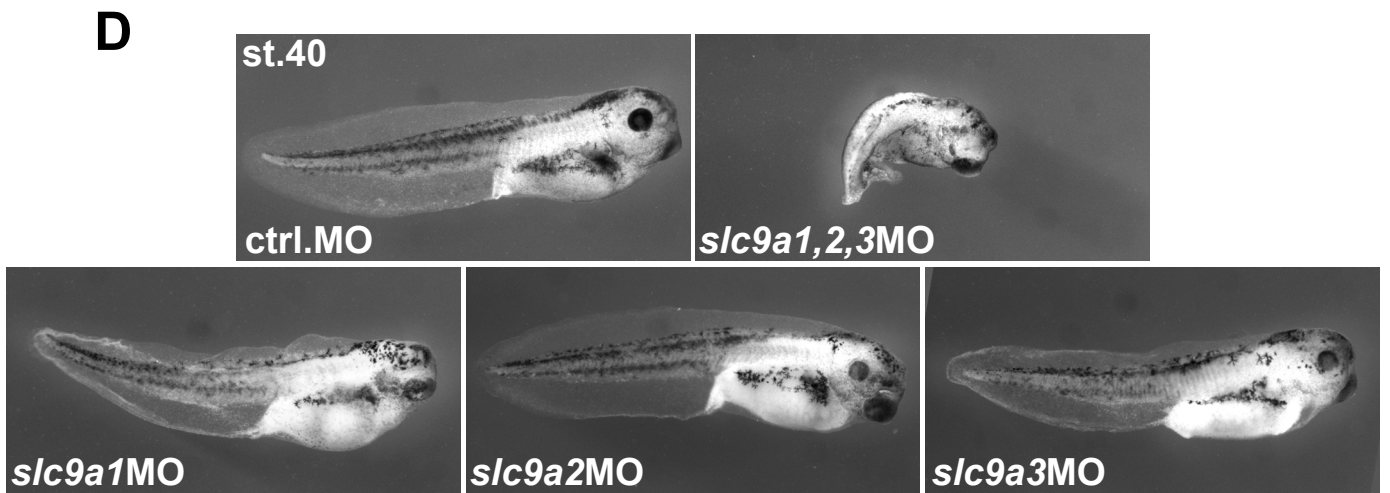

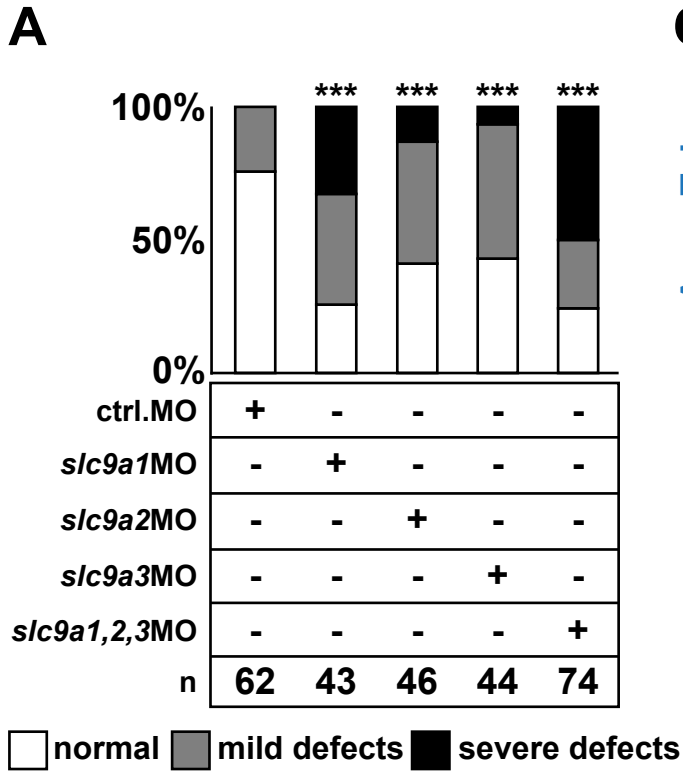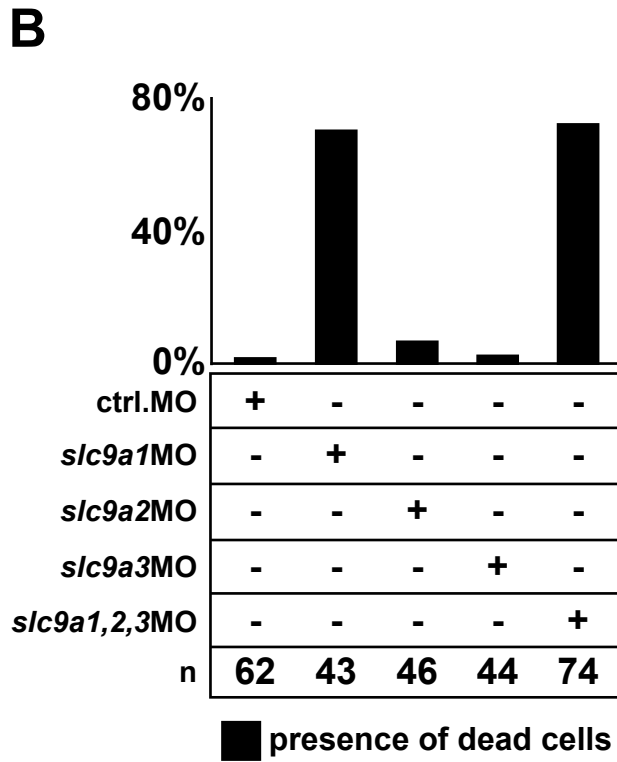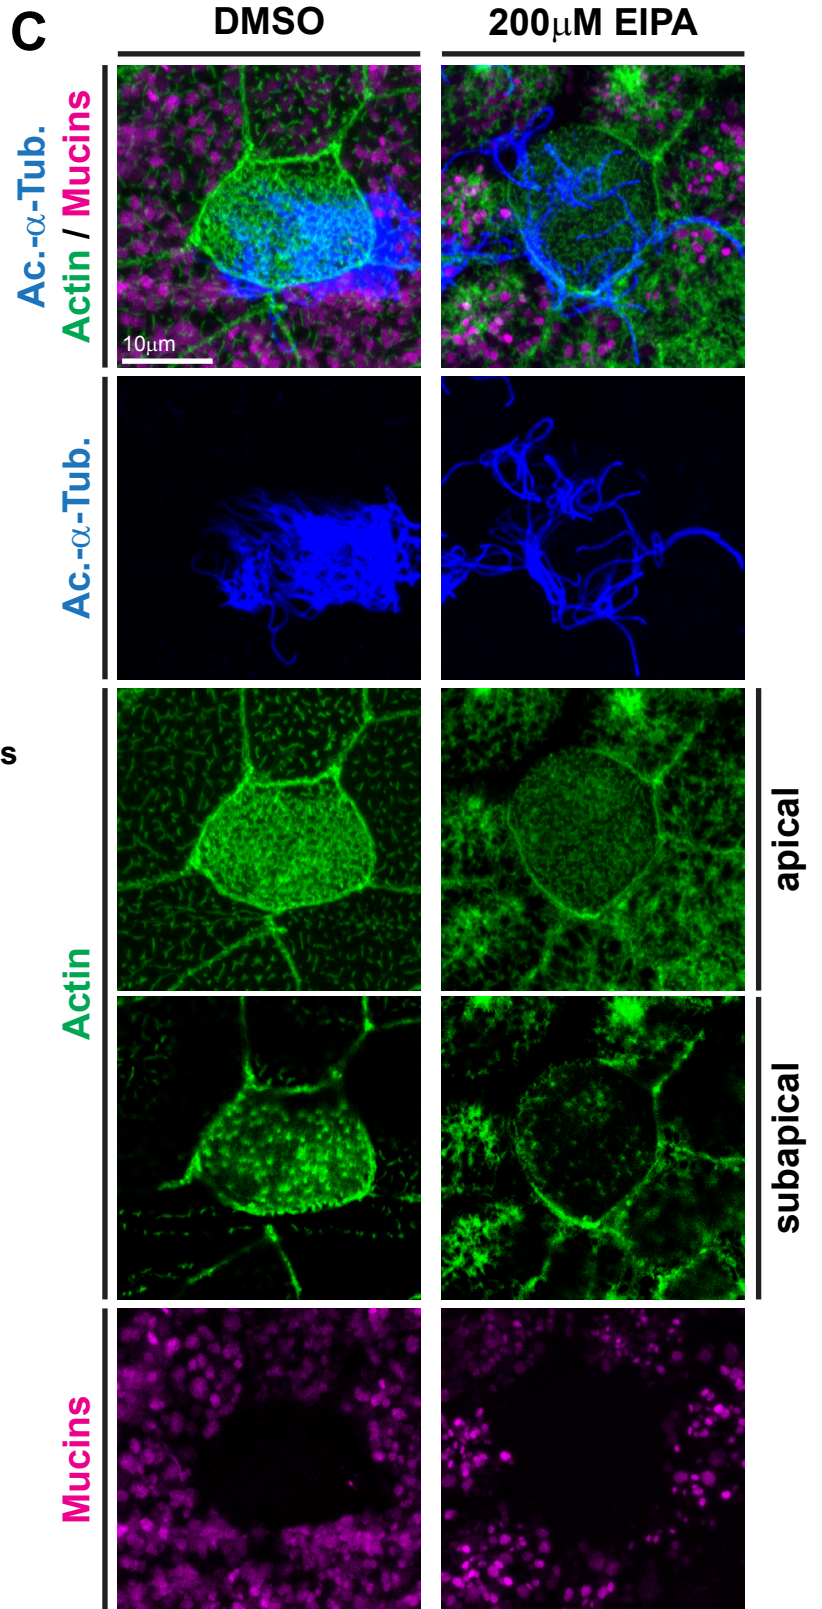

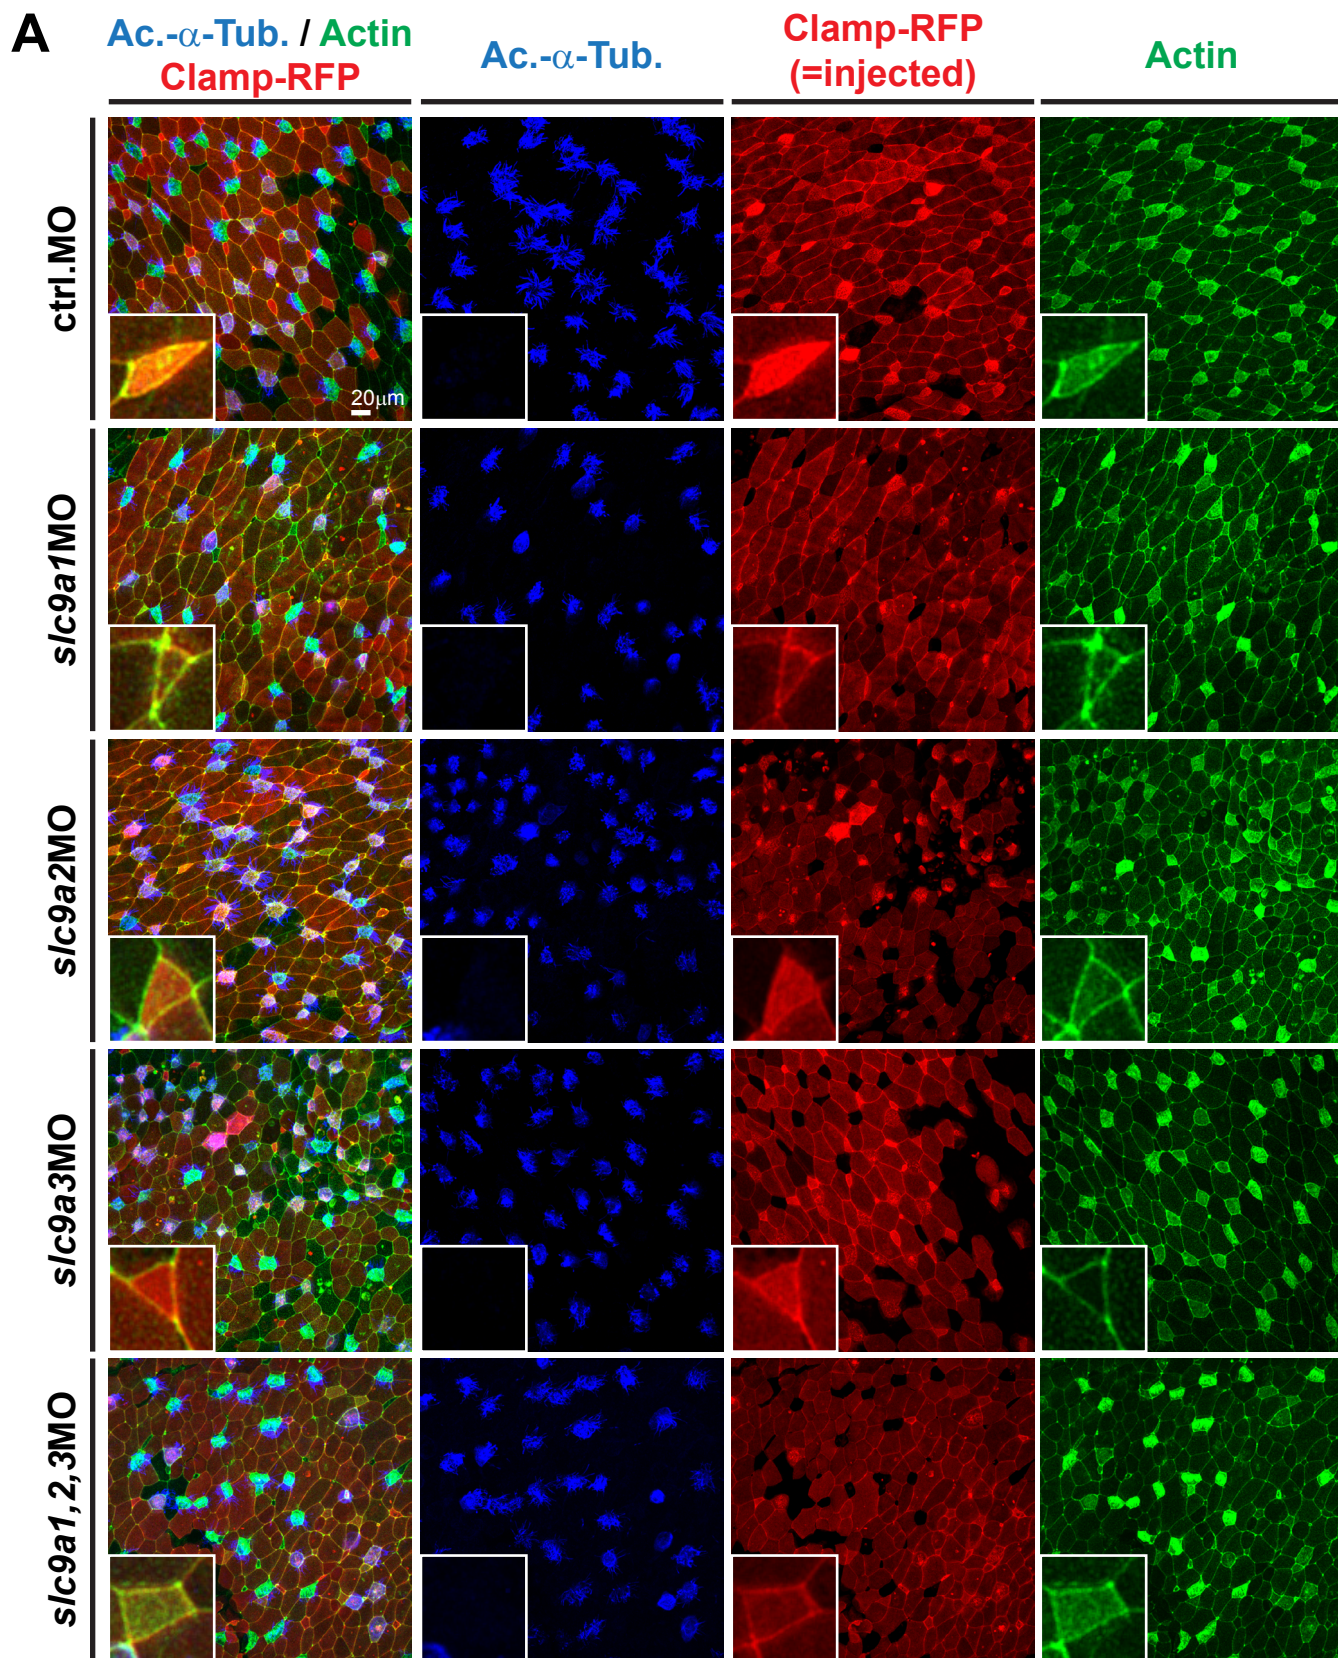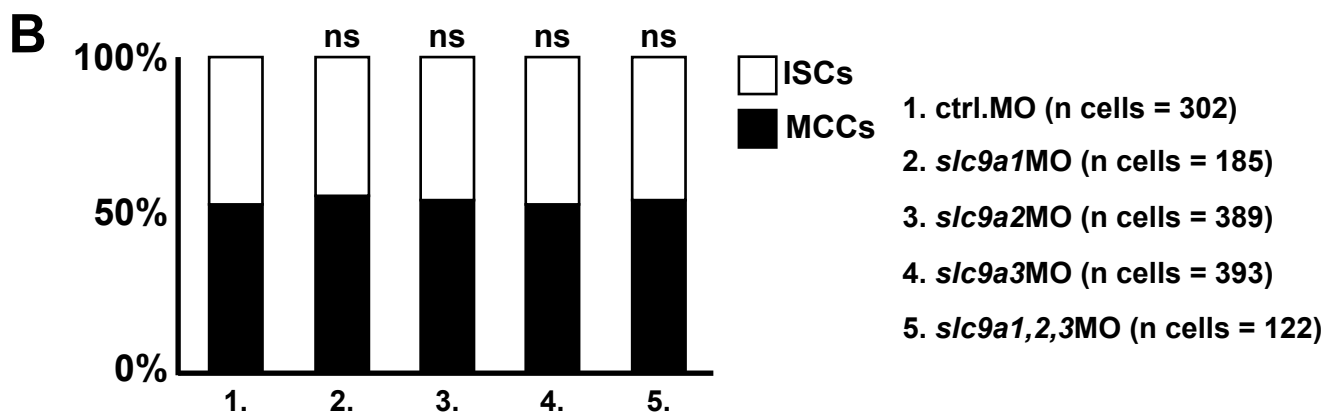

Supplement: NIHMS986881-supplement-2.pdf [file NIHMS986881-supplement-2.pdf]
